# Supplementary material
Source: publisher figshare collection journal article supplement (https://plos.figshare.com/articles/dataset/_/8109986)
Supplement: Supplementary file [file 1]

# Anlage 2 zum Genehmigungsantrag

26.8.14

|                                                             |                                                                                                         |                                 |
|-------------------------------------------------------------|---------------------------------------------------------------------------------------------------------|---------------------------------|
| Tier No: <u>M 139</u>                                       | Tag des Versuchsbeginns: <u>26.8.14</u>                                                                 | Tierversuch No: <u>TV 12/13</u> |
| Gewicht vor Versuchsbeginn: <u>19.0g</u>                    |                                                                                                         |                                 |
| Datum                                                       | <u>25.8.14</u>                                                                                          | <u>26.8.14</u>                  |
| Versuchstag                                                 | <u>-1</u>                                                                                               | <u>0</u>                        |
| Uhrzeit                                                     | <u>18:00</u>                                                                                            | <u>7:00</u>                     |
| Inspektion                                                  | <u>18:00</u>                                                                                            | <u>7:00</u>                     |
| Nahrung (Wasser, Trockenfutter)                             | <u>Nahrungsaufnahme</u>                                                                                 | <u>ab 9:00 Futter</u>           |
| inaktiv                                                     | -                                                                                                       | -                               |
| isoliert                                                    | -                                                                                                       | -                               |
| Beine, Bauchhaut bläulich                                   | -                                                                                                       | -                               |
| Hautwunden                                                  | -                                                                                                       | -                               |
| Aszites                                                     | -                                                                                                       | -                               |
| Abgebissene Zehen                                           | -                                                                                                       | -                               |
| Atmung (Normal, Flach, Schnell)                             | -                                                                                                       | -                               |
| Zittern                                                     | -                                                                                                       | -                               |
| Krämpfe                                                     | -                                                                                                       | -                               |
| Pflege/Manipulation                                         | -                                                                                                       | -                               |
| Keine Nahrungsaufnahme                                      | -                                                                                                       | -                               |
| Keine Flüssigkeitsaufnahme                                  | -                                                                                                       | -                               |
| Vocalization on gentle palpation                            | -                                                                                                       | -                               |
| Menge getrunkenes Wasser (Durchschnitt pr Maus im Käfig) mL | -                                                                                                       | -                               |
| Gewicht in g                                                | <u>19.0g</u>                                                                                            | <u>19.5g</u>                    |
| % Gewichtsveränderung                                       | -                                                                                                       | -                               |
| Tier fühlt sich kalt an                                     | -                                                                                                       | -                               |
| Injektion von <u>Cae-rulein</u> in mg/NaCl                  | <u>8x50mg/kg/KW</u>                                                                                     | <u>8x50mg/kg/KW</u>             |
| Keine Auffälligkeiten                                       | -                                                                                                       | -                               |
| Andere:                                                     | Bei mehr als einem klinischen Zeichen Leiter /stellvertretender Leiter des Versuchsvorhabens informiert | Tier getötet am: <u>28.8.14</u> |
| Unterschrift:                                               | <u>17:30</u>                                                                                            |                                 |

\* ab 7:00 Stunden bis 16:00

*H. Fels*
